# Supplementary material for: Genome-Wide Identification and Analysis of P-Type Plasma Membrane H+-ATPase Sub-Gene Family in Sunflower and the Role of HHA4 and HHA11 in the Development of Salt Stress Resistance
Source: MDPI journal article supplement (doi:10.3390/genes11040361), 2020-03-27
Supplement: s1 [file s1]

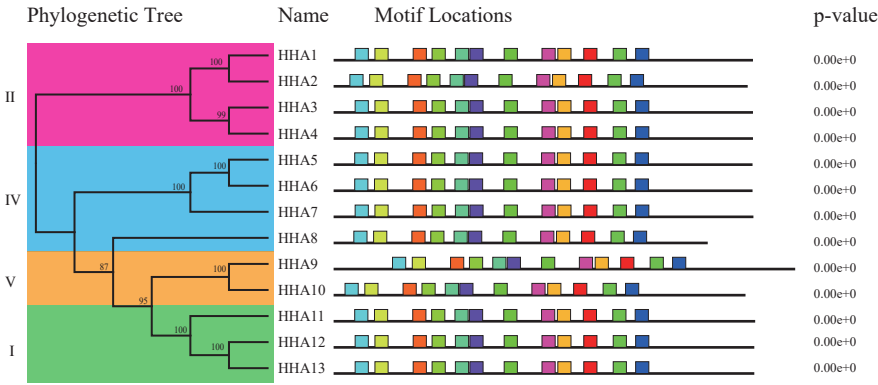

| Motif | Symbol | Motif Consensus                |
|-------|--------|--------------------------------|
| 1.    |        | FPEHKYEIVKKLQERKHICGMTGDGVNDAP |
| 2.    |        | FGPNKLEEKESKILKFLGFMWNPLSWVME  |
| 3.    |        | FGKAAHLVDSTNQVGHFQKVLTAIGNFCIC |
| 4.    |        | QQGAITKRMTAIEEMAGMDVLCSDKTGTLT |
| 5.    |        | NVKMITGDQLAIGKETGRRLGMGTNMYPSS |
| 6.    |        | VLTSRAIFQRMKNYTIYAVSITIRIVLGFM |
| 7.    |        | NDGTIMTISKDRVKPSPLPDSWKLKEIFAT |
| 8.    |        | KESPGGPWEFVGLLPLFDPPRHDSAETIRR |
| 9.    |        | DQSALTGESLPVTKNPGDGVYSGSTCKQGE |
| 10.   |        | PPDWQDFVGIIVTLVINSTISFIEENNAGN |
| 11.   |        | DPKEARAGIREVHFLPFNPVDKRTALTYID |
| 12.   |        | GIDNLLVLLIGGIAMPTVLSVTMAIGSH   |
