# Supplementary figures and images for: Genome-Wide Identification and Analysis of P-Type Plasma Membrane H+-ATPase Sub-Gene Family in Sunflower and the Role of HHA4 and HHA11 in the Development of Salt Stress Resistance
Source: MDPI journal article supplement (doi:10.3390/genes11040361), 2020-03-27

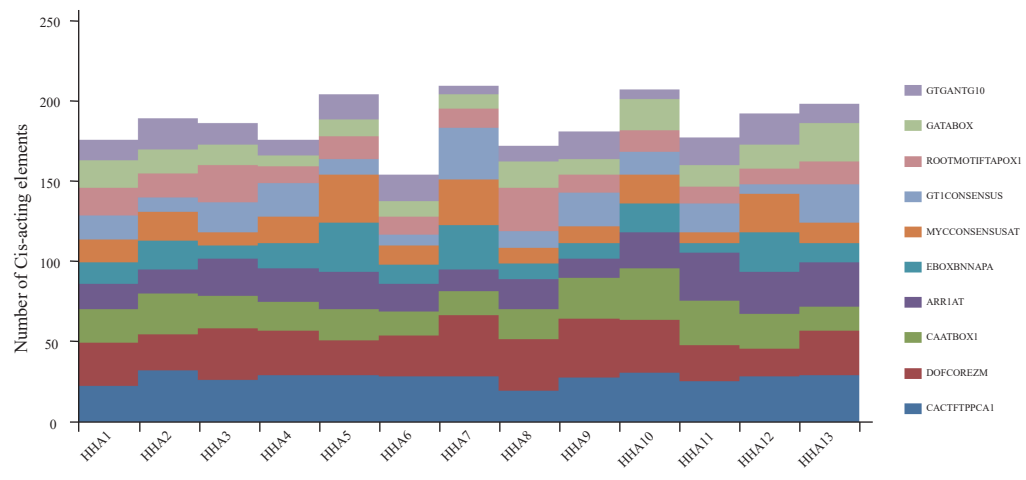

Supplement: s1 [file s1]

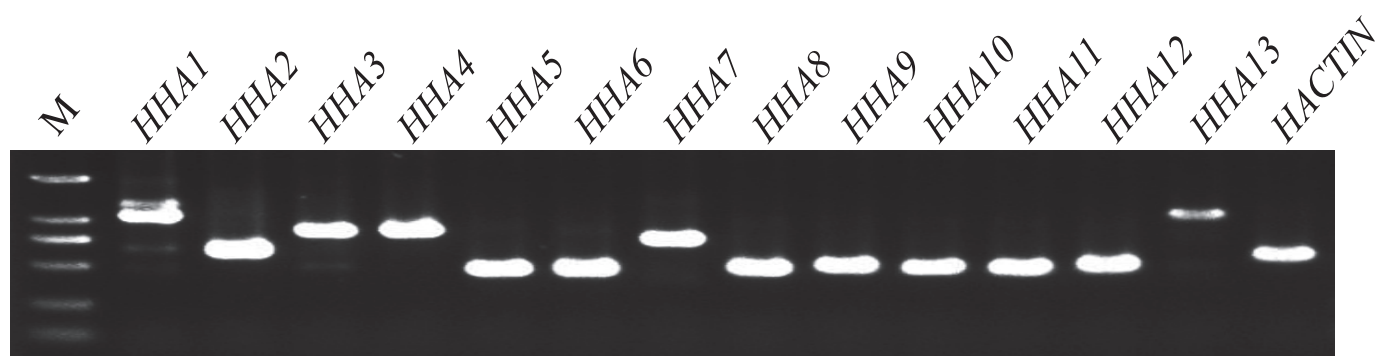

Supplement: s1 [file s1]
